# Supplementary material for: Taxonomic and functional alterations in the salivary microbiota of children with and without severe early childhood caries (S-ECC) at the age of 3
Source: PeerJ. 2022 May 31;10:e13529. doi: 10.7717/peerj.13529 (PMC9165595; doi:10.7717/peerj.13529)
Supplement: Supplemental Information 1 [file peerj-10-13529-s001.xlsx]

## Sheet: Sheet1
	Gender	Months	dmft	dmfs	saliva sample ID
S-ECC group	F	44.4	16	41	QBJMUGXVX
S-ECC group	M	43.1	14	28	QBJIJP1V0
S-ECC group	M	42.4	14	37	QBJMUGXY5
S-ECC group	F	42.2	13	38	QBJMUGY3W
S-ECC group	M	41.1	12	33	QBJMUGXWL
S-ECC group	F	40.9333	12	14	QBJMUGXX5
S-ECC group	M	40.5333	12	20	QBJMUGY0G
S-ECC group	M	45.6	12	33	QBJMUGY1W
S-ECC group	M	44.6333	11	20	QBJMUGXWC
S-ECC group	M	43.0333	11	22	QBJMUGXWJ
S-ECC group	M	42.4	10	15	QBJMUGYA5
S-ECC group	F	41.5667	10	32	QBJMUGXYE
S-ECC group	F	41.5333	8	16	QBJIJP1UY
S-ECC group	F	41.1667	8	8	QBJMUGXXX
S-ECC group	F	39.1667	8	13	QBJMUGXVG
Healthy Group	M	42.4667	0	0	QBJMUGXZQ
Healthy Group	M	41.6667	0	0	QBJMUGY8E
Healthy Group	M	39.6	0	0	QBJMUGXY3
Healthy Group	F	36.1	0	0	QBJMUGY0I
Healthy Group	M	40.9333	0	0	QBJMUGXWW
Healthy Group	F	44.5667	0	0	QBJMUGY7O
Healthy Group	F	44.3667	0	0	QBJMUGXWP
Healthy Group	F	43.5	0	0	QBJMUGY0V
Healthy Group	M	42.6	0	0	QBJMUGXYA
Healthy Group	F	41.5667	0	0	QBJMUGY66
Healthy Group	M	41	0	0	QBJMUGYAG
Healthy Group	M	43.7667	0	0	QBJMUGY4Z
Healthy Group	F	42.0333	0	0	QBJMUGY9U
Healthy Group	M	45.4667	0	0	QBJMUGY7W
Healthy Group	F	43.0667	0	0	QBJMUGY2D
